# Supplementary material for: Poly(mono-, bi- or trifuran): effect of oligomer chain length on the electropolymerization performances and polymer properties
Source: Royal Society of Chemistry journal article supplement (doi:10.1039/c4ra00437j), 2014-01-01
Supplement: c4ra00437j1.pdf [file c4ra00437j1.pdf]

## Supporting Information

# Poly(mono-, bi- or trifuran): effect of oligomer chain length on the electropolymerization performances and polymer properties

Shijie Zhen<sup>†</sup>, Baoyang Lu<sup>†</sup>, Jingkun Xu<sup>\*</sup>, Shimin Zhang, Yuzhen Li

*Jiangxi Key Laboratory of Organic Chemistry, Jiangxi Science and Technology*

*Normal University, Nanchang 330013*

\*: Corresponding author. Tel: 86–791–88537967, Fax: 86–791–83823320.

Email: [xujingkun@tsinghua.org.cn](mailto:xujingkun@tsinghua.org.cn)

<sup>†</sup>: These authors contributed equally to this work.

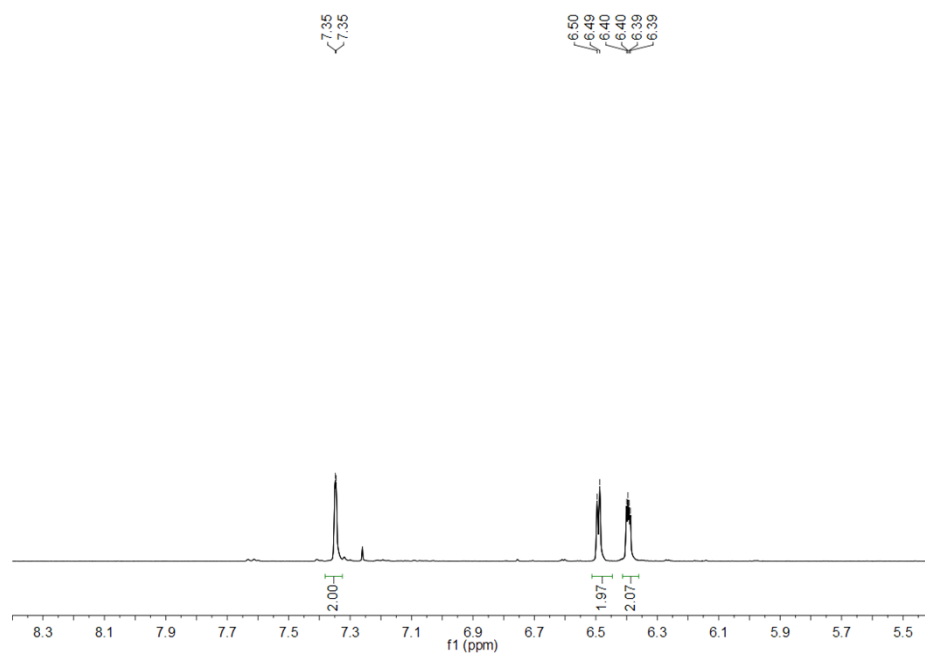

**Figure S1** <sup>1</sup>H NMR spectra of 2Fu

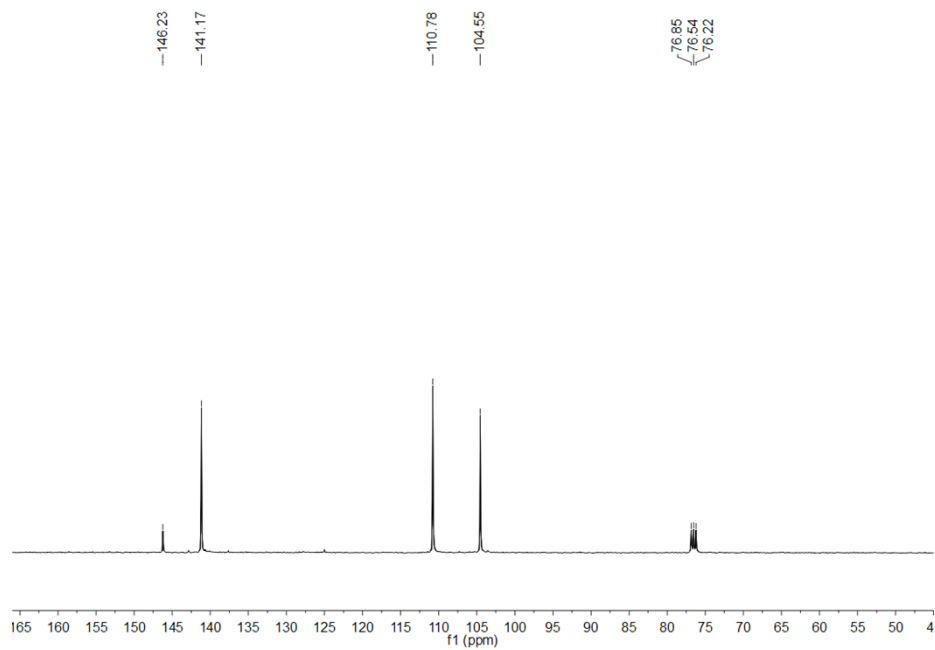

**Figure S2** <sup>13</sup>C NMR spectra of 2Fu

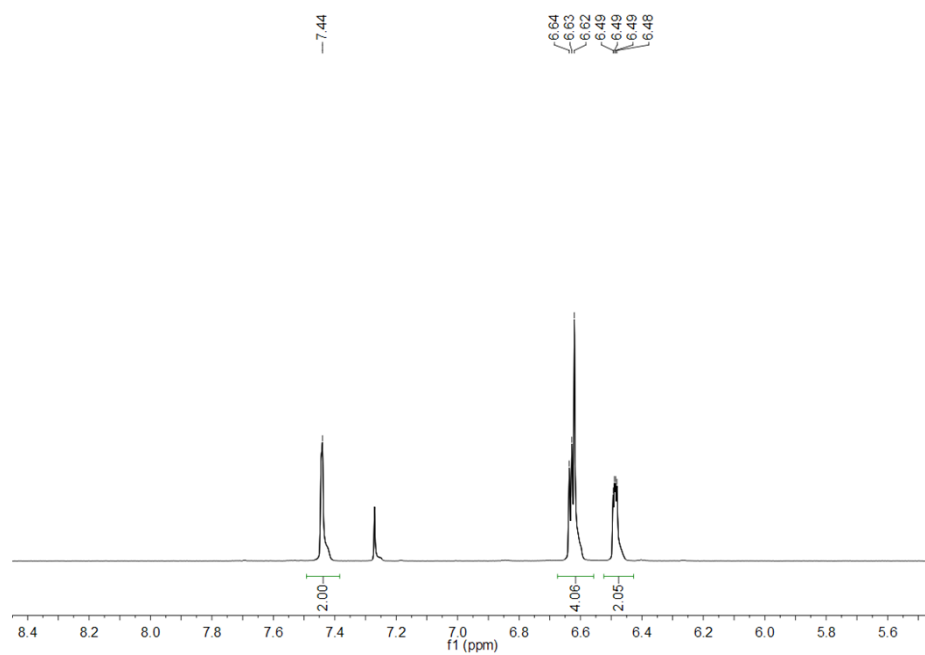

**Figure S3** <sup>1</sup>H NMR spectra of 3Fu

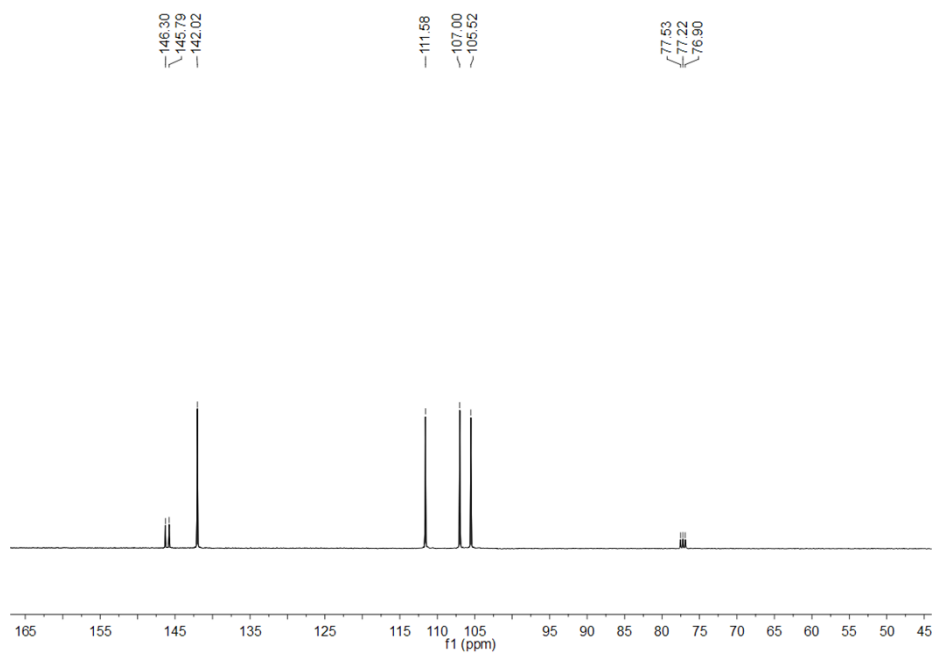

**Figure S4**  $^{13}\text{C}$  NMR spectra of 3Fu
